# Supplementary material for: Complex shaped ZnO nano- and microstructure based polymer composites: mechanically stable and environmentally friendly coatings for potential antifouling applications
Source: Royal Society of Chemistry journal article supplement (doi:10.1039/c5cp07451g), 2016-01-01
Supplement: c5cp07451g1.pdf [file c5cp07451g1.pdf]

## Supplementary Informations

### Figure S1

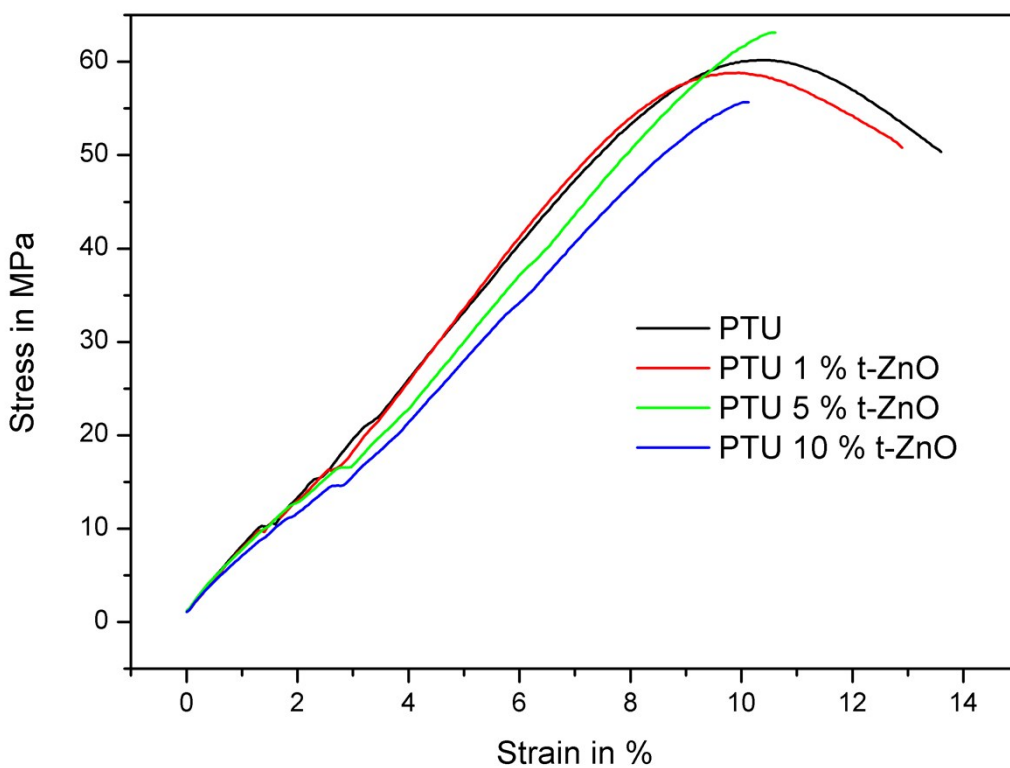

**Fig. S1:** Stress-strain diagram of pure PTU and PTU/t-ZnO composites with varying t-ZnO filling fractions (wt%).

**Figure S2**

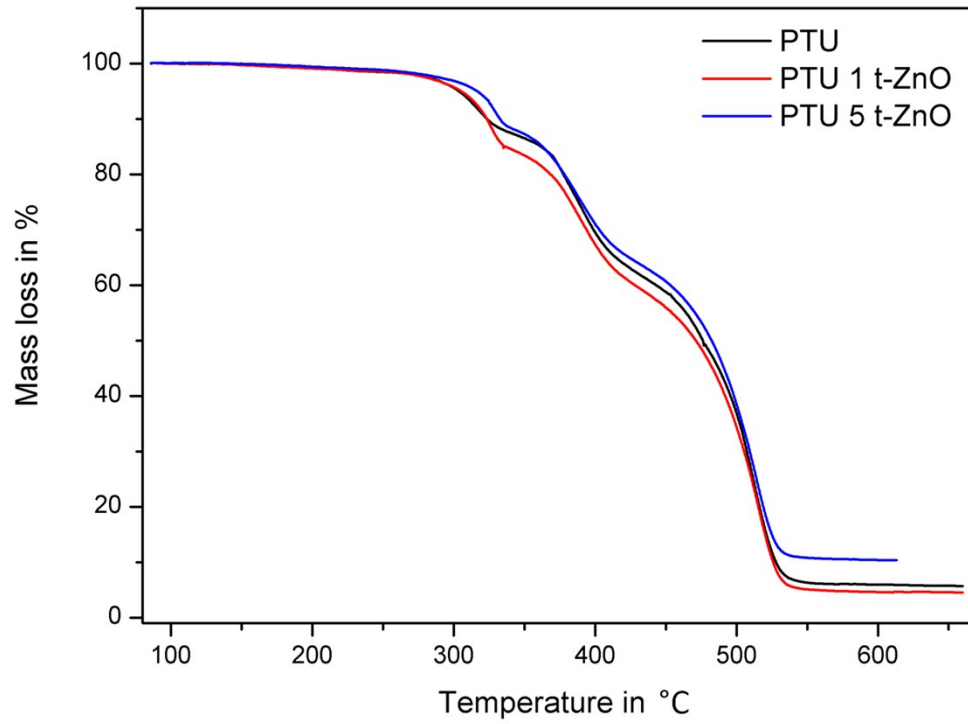

**Fig. S2:** Thermogravimetric analysis of pure PTU and PTU/t-ZnO composites with varying t-ZnO filling fractions (wt%).
